# Supplementary material for: The phosphatidylserine receptor has essential functions during embryogenesis but not in apoptotic cell removal
Source: PubMed Central journal article supplement (PMC549712; doi:10.1186/jbiol10), 2004-08-23
Supplement: jbiol10-s1.pdf [file jbiol10-s1.pdf]

## Additional Figures

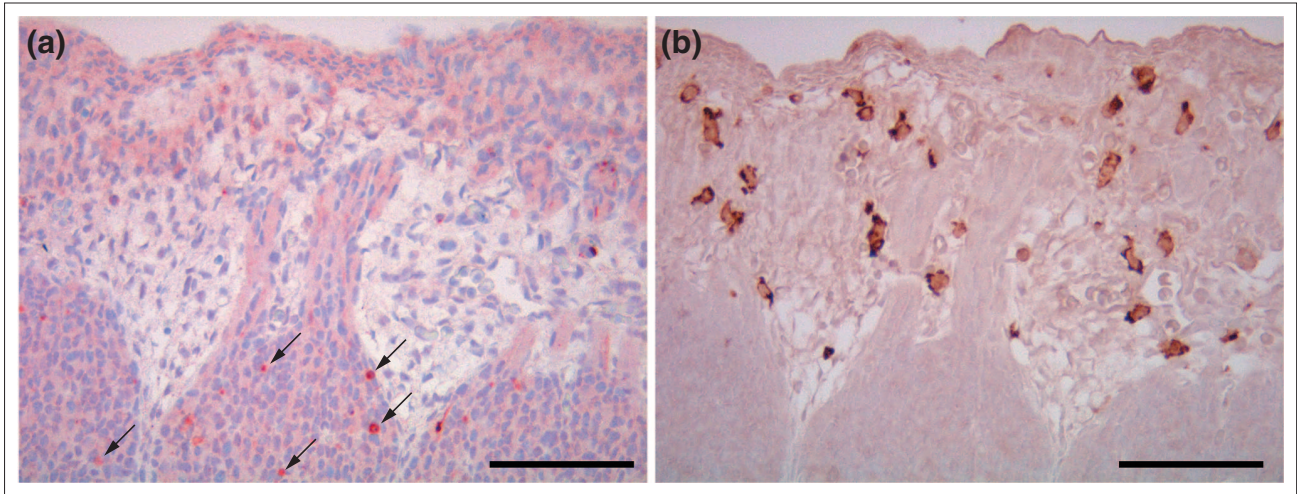

### Figure S1

Additional evidence that apoptotic cells do not co-localize with F4/80-stained macrophages during mouse development: localization of apoptotic cells and macrophages in the subcutis of developing embryos (E16.5). Examination of serial sagittal sections stained for (a) aCasp3 (red, apoptotic cells) or (b) F4/80 (brown, macrophages) reveals that apoptotic cells and macrophages are not co-localized. The same observation was made in *Ptdsr*<sup>-/-</sup> embryos and in all organs and developmental stages analyzed in this study. Scale bar, 100  $\mu$ m.

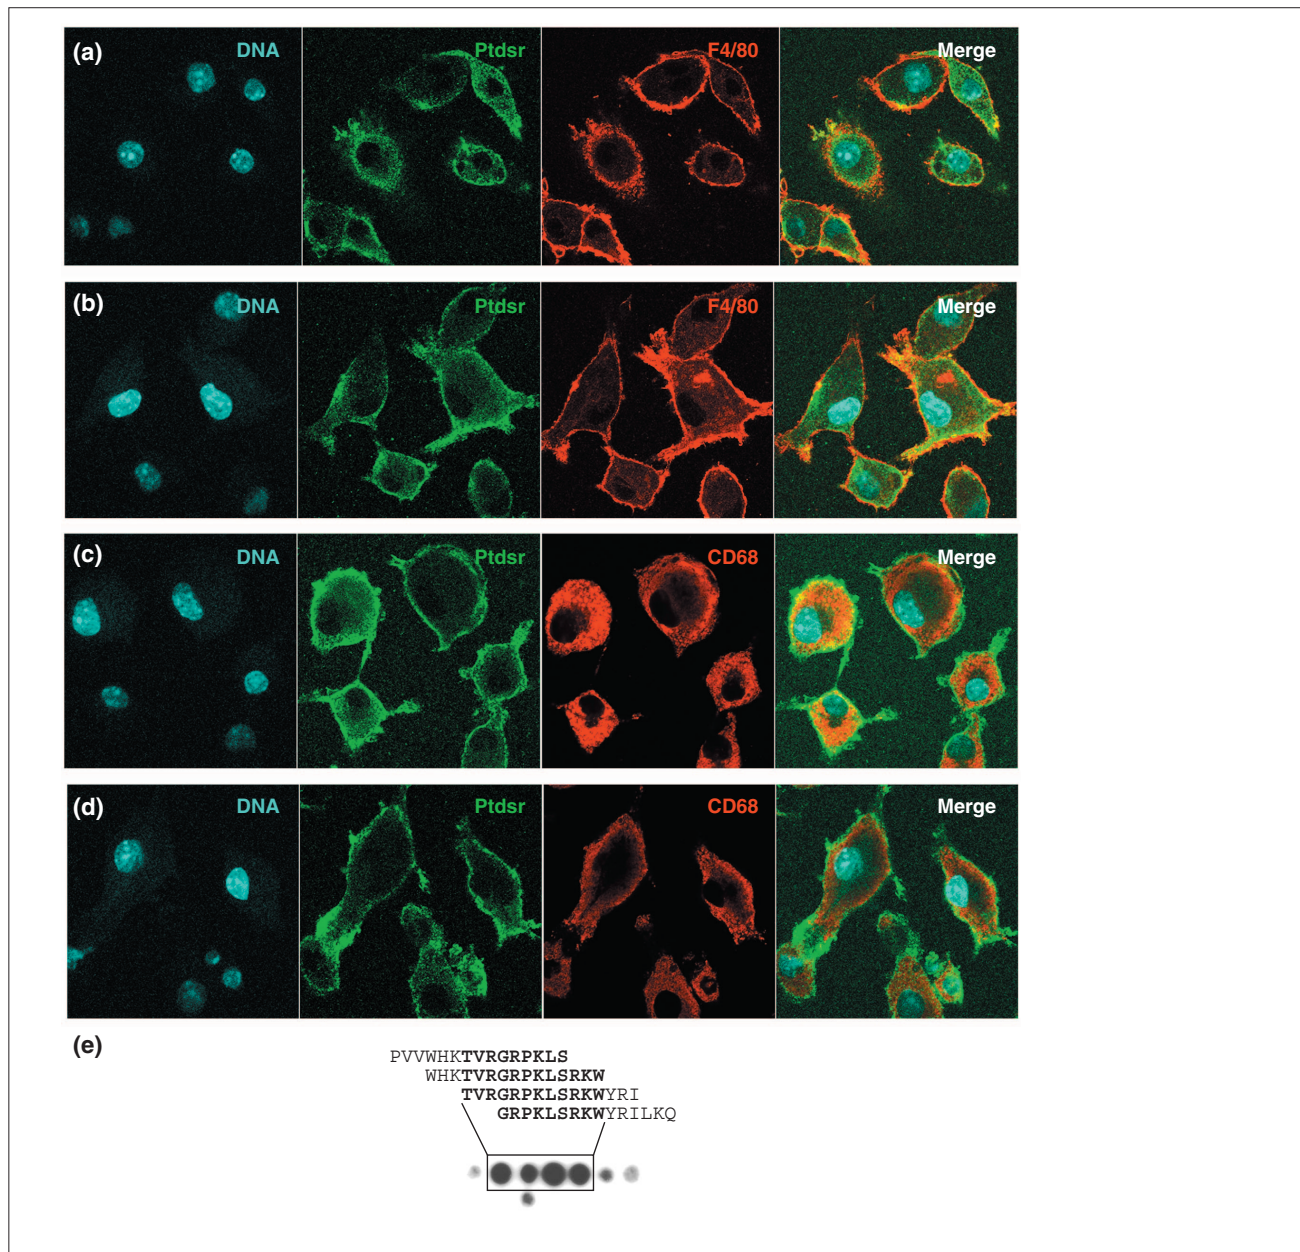**Figure S2**

Immunohistochemical staining of *Pt dsr*<sup>+/+</sup> and *Pt dsr*<sup>-/-</sup> macrophages with the anti-*Pt dsr* antibody mAb 217G8E9. (a,c) Wild-type and (b,d) knockout fetal-liver-derived macrophages (FLDMs) were stained with the mouse monoclonal IgM anti-*Pt dsr* antibody mAb 217 [26] (Cascade BioScience, Winchester, USA; #ABM-3099), and the localization of the mAb 217 antigen was analyzed in (a,b) non-permeabilized and (c,d) permeabilized cells. In both genotypes (<sup>+/+</sup> and <sup>-/-</sup>) the staining was indistinguishable (compare a with b or c with d) and did not change under different experimental conditions. The permeabilized FLDMs (c,d) were counter-stained with an antibody against the lysosomal glycoprotein CD68 (Serotec, #MCA 1957) and the non-permeabilized macrophages (a,b) with an antibody against the macrophage cell-surface glycoprotein F4/80 (Serotec, #MCAP 497). DNA was stained in all cells with Hoechst 33342 (Molecular Probes) to visualize nuclei. As secondary antibodies, Alexa488-anti-mouse IgM and Alexa568-anti rat IgG antibody (Molecular Probes) were used, respectively. Using fibroblasts or FLDMs pretreated with  $\beta$ -glucan for 24 h showed no difference in staining between the two genotypes. Only a slight increase in the expression of the antigen recognized by the antibody mAb 217 could be detected after pretreatment of macrophages with  $\beta$ -glucan (data not shown). (e) Recognition of linear epitopes of *Pt dsr* protein. A peptide array representing the carboxy-terminal part (amino acids 289-403) of the *Pt dsr* protein was chemically synthesized on cellulose sheets and incubated with the monoclonal antibody mAb 217 [52]. Peptides mainly recognized by the antibody are boxed; the deduced amino-acid sequences of the epitopes recognized are in bold.
